# Supplementary material
Source: Springer Nature journal article supplement (https://www.springermedizin.de/resource/supplementary/12865_2008_235_MOESM5_ESM.pdf/9427566)

**(A)**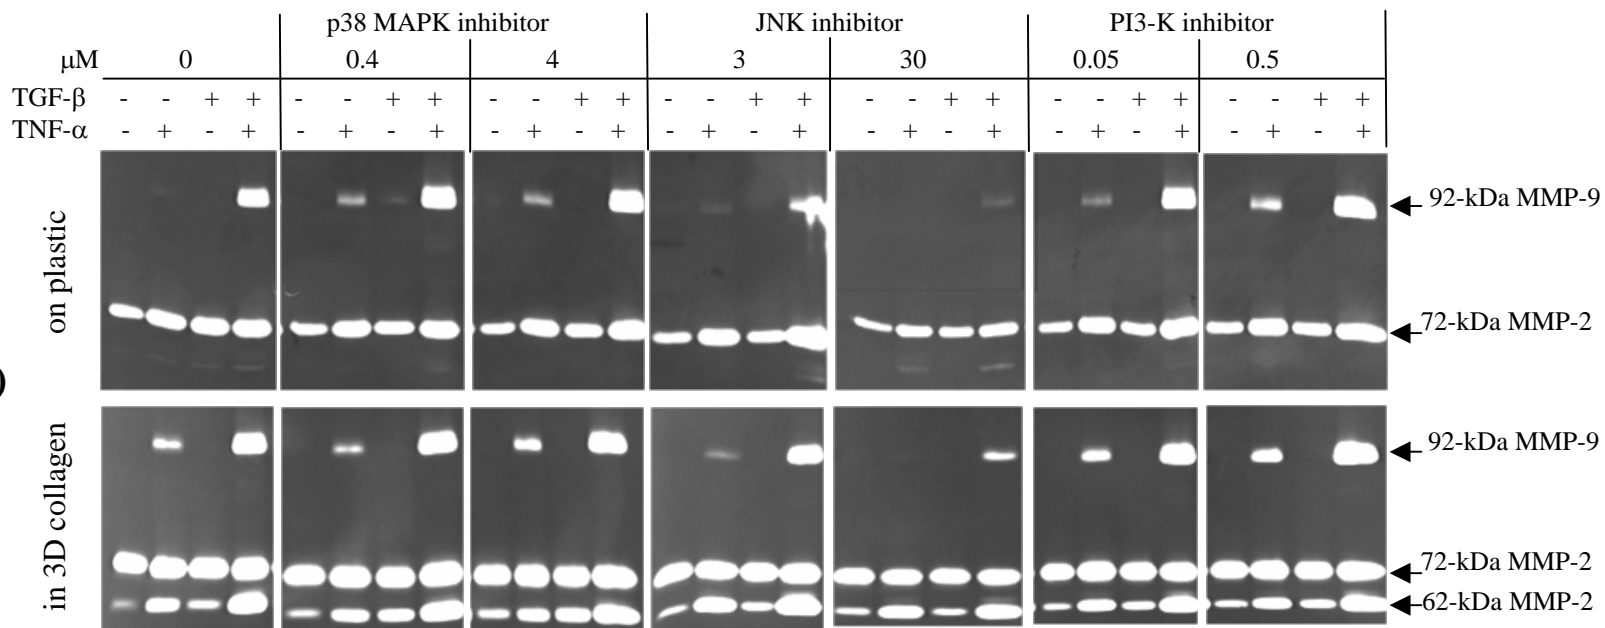**(B)**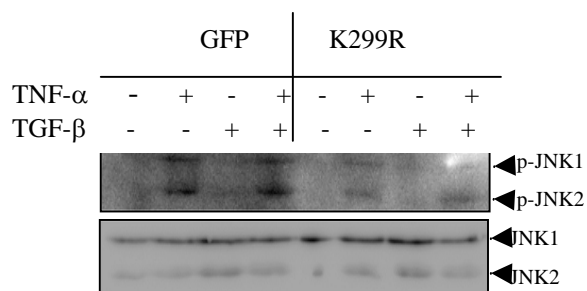**(C)**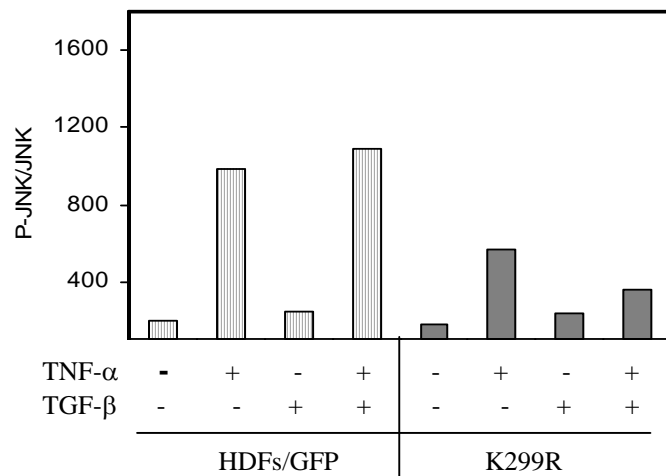

Supplement: MOESM5 [file 9427566]
